# Supplementary material for: The in vivo biofilm formation of Staphylococcus aureus in a mouse model: albumin is the major biofilm matrix
Source: Research Square preprint supplement (doi:10.21203/rs.3.rs-3368672/v1), 2023-10-02
Supplement: Supplementary file 1 [file abafe129d2d0ef325fa92b84.docx]

**Supplementary materials and methods**

**SDS-PAGE and in-gel protein digestion**

Proteins from the biofilm samples were separated using 10% SDS-PAGE and stained with 0.5% Coomassie Brilliant Blue G-250 (AppliChem GmbH, Germany). The stained gel lanes were cut into 10 slices and subjected to in-gel tryptic digestion as described previously1. Briefly, the gel pieces were destained in 10% methanol (Mallinckrodt Baker, NJ, USA), then dehydrated in acetonitrile (Mallinckrodt Baker, NJ, USA) and dried in a SpeedVac. The proteins were reduced with 25 mM NH4HCO3 containing 10 mM dithiothreitol (Biosynth AG, Switzerland) at 60oC for 30 min and alkylated with 55 mM iodoacetamide (Amersham Biosciences, UK) at room temperature for 30 min. After reduction and alkylation, proteins were digested by sequencing-grade modified porcine trypsin (20 μg/mL; Promega, Madison, WI, USA) overnight at 37oC. Peptides were extracted with acetonitrile (ACN) and dried in a SpeedVac.

**Reverse-phase LC-MS/MS analysis**

For protein identification, each tryptic digested peptide mixture was reconstituted in buffer A (0.1% formic acid; Sigma-Aldrich), loaded on to a trap column (Zorbax 300SB-C18, 0.3 × 5 mm; Agilent Technologies, Taiwan) at a flow rate of 0.2 μL/min in HPLC buffer A, and separated on a resolving 10-cm analytical C18 column (inner diameter, 75 μm) using a 15-μm tip (New Objective, Woburn, MA, USA). The peptides were eluted using a linear gradient of 0-10% buffer B (99.9% ACN containing 0.1% formic acid) for 3 min, 10-30% buffer B for 35 min, 30-35% buffer B for 4 min, 35-50% buffer B for 1 min, 50-95% buffer B for 1 min, and 95% buffer B for 8 min, all at a flow rate of 0.25 μL/min across the analytical column.

The LC apparatus was coupled with a two-dimensional linear ion trap mass spectrometer (LTQ-Orbitrap, Thermo Fisher, CA, USA) operated using the Xcalibur 2.0 software package (Thermo Fisher). Intact peptides were detected in the Orbitrap at a resolution of 30,000. Internal calibration was performed using the ion signal of (Si(CH3)2O)6H+ at *m/z* 445.120025 as a lock mass. For the MS analysis, we used a data-dependent procedure that alternated between one MS scan and six MS/MS scans for the six most abundant precursor ions. The *m/z* values selected for the MS/MS analyses were dynamically excluded for 180 sec. The electrospray voltage was applied at 1.8 kV. Both MS and MS/MS spectra were acquired using the one microscan with maximum fill times of 1,000 ms and 100 ms for the MS and MS/MS analyses, respectively. To prevent overfilling of the ion trap, automatic gain control was used. For the generation of MS/MS spectra, 5 × 104 ions were accumulated and resolved in the ion trap. For the MS scans, the *m/z* scan range was set at 350-2,000 Da2.

**Protein database searching for protein identification**

For database searching, the obtained MS/MS spectra were analyzed using the Mascot algorithm (Version 2.2, Matrix Science, Boston, MA, USA) against the Swiss-Prot mouse sequence database (released Feb, 2022, selected for *Mus musculus*, 17126 entries) of the European Bioinformatics Institute. The fragment ion mass tolerance was set to 0.5 Da and the parent ion mass tolerance was set to 10 ppm, with trypsin as the digestion enzyme. Up to one missed cleavage was allowed, and searches were performed with the parameters of: variable oxidation on methionine (+15.99 Da) and fixed carbamidomethylation on cysteine (+57 Da). A random sequence database was used to estimate false-positive rates for peptide matches.

After Mascot searching, the obtained files were processed through the Scaffold software (Version 3.1; Proteome Software, Portland, OR, USA). The Scaffold software includes the PeptideProphet, which aids in the assignment of peptide MS spectra, as well as the ProteinProphet program, which assigns and groups peptides to a unique protein/protein family when they are shared among several isoforms. We used PeptideProphet and ProteinProphet probabilities ≥ 0.95 to ensure an overall false-discovery rate below 0.5%. Only proteins with two or more identified peptides were retained in this study3,4.

**References**

1 Kuo, R. L. *et al.* Interactome profiling of N-terminus-truncated NS1 protein of influenza A virus reveals role of 14-3-3γ in virus replication. *Pathogens* **11**, 733, doi:10.3390/pathogens11070733 (2022).

2 Hsu, C. W. *et al.* Proteomic profiling of paired interstitial fluids reveals dysregulated pathways and salivary NID1 as a biomarker of oral cavity squamous cell carcinoma. *Mol. Cell. Proteomics* **18**, 1939-1949, doi:10.1074/mcp.RA119.001654 (2019).

3 Kuo, R. L. *et al.* Interactome analysis of NS1 protein encoded by influenza A H7N9 virus reveals an inhibitory role of NS1 in host mRNA maturation. *J. Proteome Res.* **17**, 1474-1484, doi:10.1021/acs.jproteome.7b00815 (2018).

4 Kuo, R. L. *et al.* Interactome analysis of the NS1 protein encoded by influenza A H1N1 virus reveals a positive regulatory role of host protein PRP19 in viral replication. *J. Proteome Res.* **15**, 1639-1648, doi:10.1021/acs.jproteome.6b00103 (2016).
