# Supplementary material for: The in vivo biofilm formation of Staphylococcus aureus in a mouse model: albumin is the major biofilm matrix
Source: Research Square preprint supplement (doi:10.21203/rs.3.rs-3368672/v1), 2023-10-02
Supplement: Supplementary file 2 [file b823dcbbddcf0c251ddf6105.docx]

**Table S1. The minimum inhibition concentrations (MICs) of different antibiotics against planktonic-grown bacteria in the absence/presence of albumin**

|  | Strain | | | | | | | | | | |
| --- | --- | --- | --- | --- | --- | --- | --- | --- | --- | --- | --- |
|  | 12598 | |  | 12598Δ*icaA* | |  | 12598Δ*cidA* | |  | 12598Δ*icaA*/*cidA* | |
| Albumin* | - | + |  | - | + |  | - | + |  | - | + |
| Antibiotic | MIC (μg/ml) | | | | | | | | | | |
| Vancomycin | 0.5 | 0.5 |  | 0.5 | 0.5 |  | 1 | 1 |  | 1 | 1 |
| Ampicillin | < 0.5 | 0.5 |  | < 0.5 | < 0.5 |  | < 0.5 | < 0.5 |  | < 0.5 | < 0.5 |
| Gentamycin | 1 | 1 |  | 1 | 1 |  | 2 | 2 |  | 2 | 2 |
| SXT | 1 | 2 |  | 1 | 2 |  | 2 | 2 |  | 2 | 2 |

*Concentration of BSA supplied in the media was 2.5% (w/v).
